# Supplementary material for: The construction of a two-dimensional organic–inorganic hybrid double perovskite ferroelastic with a high Tc and narrow band gap
Source: Royal Society of Chemistry journal article supplement (doi:10.1039/d1sc07045b), 2022-01-01
Supplement: d1sc07045b1.pdf [file d1sc07045b1.pdf]

## Supplementary information

### Table of contents

|                                                                                                                                                                                                                                                                                                  |     |
|--------------------------------------------------------------------------------------------------------------------------------------------------------------------------------------------------------------------------------------------------------------------------------------------------|-----|
| Experimental Measurement Methods .....                                                                                                                                                                                                                                                           | S2  |
| Physical measurements.....                                                                                                                                                                                                                                                                       | S2  |
| DSC Measurements.....                                                                                                                                                                                                                                                                            | S2  |
| Single-Crystal X-ray Crystallography.....                                                                                                                                                                                                                                                        | S2  |
| Solid-state NMR measurements.....                                                                                                                                                                                                                                                                | S2  |
| The equations for calculation of the spontaneous strain.....                                                                                                                                                                                                                                     | S3  |
| Density Functional Theory Calculations.....                                                                                                                                                                                                                                                      | S3  |
| Figure S1. Hydrogen bonds of (DPA) <sub>4</sub> Bi <sub>2</sub> Br <sub>10</sub> (a), (DPA) <sub>5</sub> Pb <sub>2</sub> Br <sub>9</sub> (b) and (DPA) <sub>4</sub> AgBiBr <sub>8</sub> (c).....                                                                                                 | S3  |
| Figure S2. Packing diagram of compound .....                                                                                                                                                                                                                                                     | S4  |
| Figure S3. (a) Two-dimensional powder diffraction pattern of (DPA) <sub>4</sub> AgBiBr <sub>8</sub> before (350 K) and after (390 K) phase transition temperature. (b) Variable-temperature powder X-ray diffraction patterns of (DPA) <sub>4</sub> AgBiBr <sub>8</sub> from 350 K to 390 K..... | S4  |
| Figure S4. Calculated energy band structure of (DPA) <sub>4</sub> AgBiBr <sub>8</sub> without spin-orbit coupling (SOC), and corresponding partial density of states (PDOS).....                                                                                                                 | S5  |
| Table S1. Crystal data and structure refinements for (DPA) <sub>4</sub> Bi <sub>2</sub> Br <sub>10</sub> , (DPA) <sub>5</sub> Pb <sub>2</sub> Br <sub>9</sub> and (DPA) <sub>4</sub> AgBiBr <sub>8</sub> .....                                                                                   | S5  |
| Table S2. Selected bond lengths [Å] and bond angles [°] for (DPA) <sub>4</sub> Bi <sub>2</sub> Br <sub>10</sub> at 200 K.....                                                                                                                                                                    | S6  |
| Table S3. Selected bond lengths [Å] and bond angles [°] for (DPA) <sub>5</sub> Pb <sub>2</sub> Br <sub>9</sub> at 273 and 310 K.....                                                                                                                                                             | S7  |
| Table S4. Selected bond lengths [Å] and bond angles [°] for (DPA) <sub>4</sub> AgBiBr <sub>8</sub> at 150 and 375 K.....                                                                                                                                                                         | S8  |
| Table S5. Hydrogen-bond geometry (Å, °) for (DPA) <sub>4</sub> Bi <sub>2</sub> Br <sub>10</sub> at 200 K.....                                                                                                                                                                                    | S9  |
| Table S6. Hydrogen-bond geometry (Å, °) for (DPA) <sub>5</sub> Pb <sub>2</sub> Br <sub>9</sub> at 273 K.....                                                                                                                                                                                     | S10 |
| Table S7. Hydrogen-bond geometry (Å, °) for (DPA) <sub>4</sub> AgBiBr <sub>8</sub> at 150 K.....                                                                                                                                                                                                 | S11 |
| Table S8. Crystal data and structure refinements for (DPA) <sub>5</sub> Pb <sub>2</sub> Br <sub>9</sub> and (DPA) <sub>4</sub> AgBiBr <sub>8</sub> at high temperature phase.....                                                                                                                | S11 |
| Table S9. The reported space group and band gap of Ruddlesden–Popper AgBiBr- and AgBiI-based materials (n=1).....                                                                                                                                                                                | S12 |
| Appendix S1. Acronyms arranged in top-down order in Table S9.....                                                                                                                                                                                                                                | S12 |
| Reference: .....                                                                                                                                                                                                                                                                                 | S12 |

## Experimental Measurement Methods

**Physical measurements.** Differential scanning calorimetry (DSC), variable-temperature single-crystal X-ray diffraction, powder X-ray diffraction (PXRD) measurements, dielectric measurements, ultraviolet-vis spectral measurements and electronic structure calculations were described in Supporting Information.

### DSC Measurements.

DSC measurement of  $(\text{DPA})_4\text{Bi}_2\text{Br}_{10}$ ,  $(\text{DPA})_5\text{Pb}_2\text{Br}_9$  and  $(\text{DPA})_4\text{AgBiBr}_8$  was carried out in the temperature range from 173 to 453 K at a rate of 20 K  $\text{min}^{-1}$  using a PerkinElmer Diamond DSC instrument.

### Single-Crystal X-ray Crystallography.

Variable-temperature single-crystal XRD data of  $(\text{DPA})_4\text{Bi}_2\text{Br}_{10}$ ,  $(\text{DPA})_5\text{Pb}_2\text{Br}_9$  and  $(\text{DPA})_4\text{AgBiBr}_8$  were collected using a Bruker APEX-II CCD with Mo  $K\alpha$  radiation ( $\lambda = 0.71073 \text{ \AA}$ ) at different temperature, whose processing was disposed by the APEX3. Variable-temperature crystal structures were solved using a direct method and subsequent continuous Fourier synthesis. Subsequently, these crystals were refined by full-matrix leastsquares methods based on F2 using the SHELXTL software package. Eventually, in addition to the asymmetric units and packing shown in main body using DIAMOND software, other relevant crystallographic data and structure refinement are listed in **Table S1** and **S2** in supporting information.

### Solid-state NMR measurements.

Like the synthesis of  $(\text{DPA})_4\text{AgBiBr}_8$ , in the synthesis process, HBr acid (AR $\geq$ 40%, 10 ml) was replaced with DBr (48% w/w in  $\text{D}_2\text{O}$ , 99+%, 10 g). Eventually, the yellow block crystals of  $(\text{DPA-d}_3)_4\text{AgBiBr}_8$  for single-crystal XRD were obtained after slow cooling.

Wide-line  $^2\text{H}$  NMR studies were performed by using a Bruker Avance III 300 spectrometer operating at 46.07 MHz. The  $^2\text{H}$  spectra were recorded by using a Bruker two-channel static polarization enhancement (PE) probe with a homemade 2.5 mm coil. The spectra were acquired by using a solid echo pulse sequence with a pulse width of 2  $\mu\text{s}$  at a radio-frequency (RF) amplitude of  $\gamma\text{B}_1/2\pi = 125 \text{ kHz}$ . The refocusing delay  $\tau$

was approximately 30  $\mu$ s. The  $^2\text{H}$  spectra were simulated by using the weblab software (<https://weblab2.mpip-mainz.mpg.de/weblab66/weblab.html>).

### The equations for calculation of the spontaneous strain.

For  $mmm\bar{1}$ , the spontaneous strain tensor can be calculated by the following matrix:

$$\varepsilon_{ij} = \begin{pmatrix} \frac{a_{RTP}}{a_{HTP}} \sin \gamma_{RTP} - 1 & \frac{1}{2} \left( \frac{a_{RTP}}{a_{HTP}} \cos \gamma_{RTP} \right) & \frac{1}{2} \left( -\frac{c_{RTP} \sin \alpha_{RTP} \cos(180^\circ - \beta_{RTP})}{c'_{HTP}} \right) \\ \frac{1}{2} \left( \frac{a_{RTP}}{a_{HTP}} \cos \gamma_{RTP} \right) & \frac{b_{RTP}}{b'_{HTP}} - 1 & \frac{1}{2} \left( \frac{c_{RTP} \cos \alpha_{RTP}}{c'_{HTP}} \right) \\ \frac{1}{2} \left( -\frac{c_{RTP} \sin \alpha_{RTP} \cos(180^\circ - \beta_{RTP})}{c'_{HTP}} \right) & \frac{1}{2} \left( \frac{c_{RTP} \cos \alpha_{RTP}}{c'_{HTP}} \right) & \frac{c_{RTP} \sin \alpha_{RTP} \sin(180^\circ - \beta_{RTP})}{c'_{HTP}} - 1 \end{pmatrix}$$

The total spontaneous strain  $\varepsilon_{ss}$  can be calculated by  $\varepsilon_{ss} = \sqrt{\sum_{ij} \varepsilon_{ij}^2}$ .

### Density Functional Theory Calculations.

Density functional theory (DFT) were performed with the Vienna Ab Initio Simulation Package (VASP)<sup>1</sup>. The Perdew–Burke–Ernzerhof(PBE)<sup>2</sup> functional and frozen-core all electron projector augmented wave (PAW)<sup>3</sup> model was employed. The cutoff energy was set to 500 eV. And the convergence criteria for the residual force and energy on each atom during structure relaxation were set to 0.01 eV/Å and  $10^{-5}$  eV, respectively.

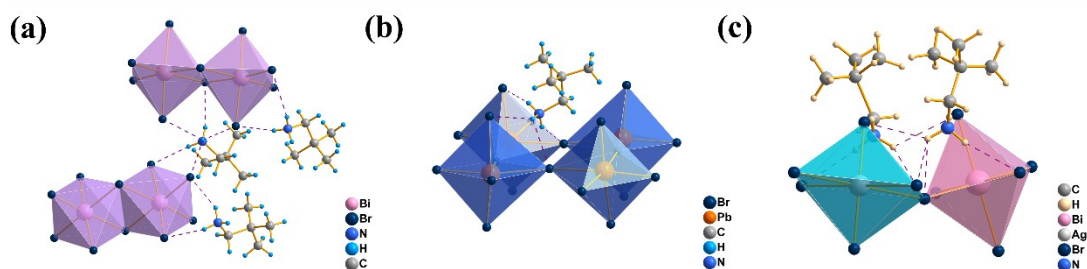

**Figure S1.** Hydrogen bonds of  $(\text{DPA})_4\text{Bi}_2\text{Br}_{10}$  (a),  $(\text{DPA})_5\text{Pb}_2\text{Br}_9$  (b) and  $(\text{DPA})_4\text{AgBiBr}_8$  (c).

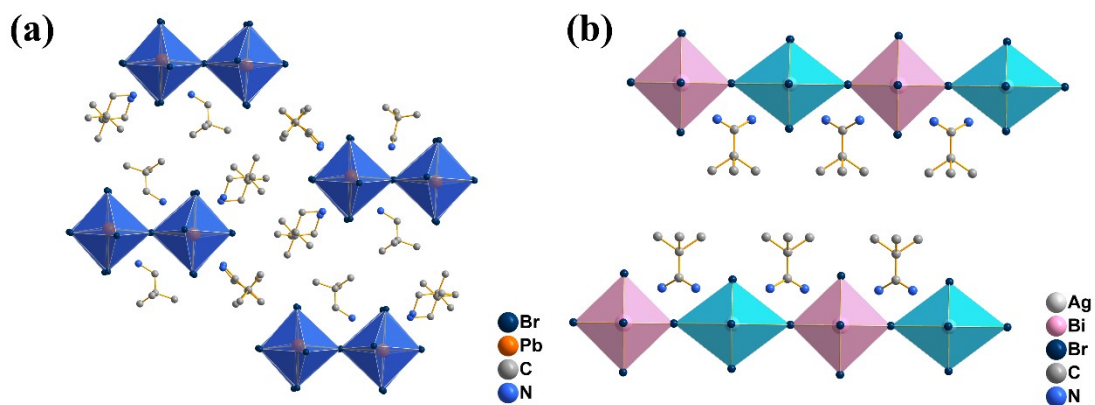

**Figure S2.** Packing diagram of compound  $(\text{DPA})_5\text{Pb}_2\text{Br}_9$  (a) and  $(\text{DPA})_4\text{AgBiBr}_8$  (b) at high temperature.

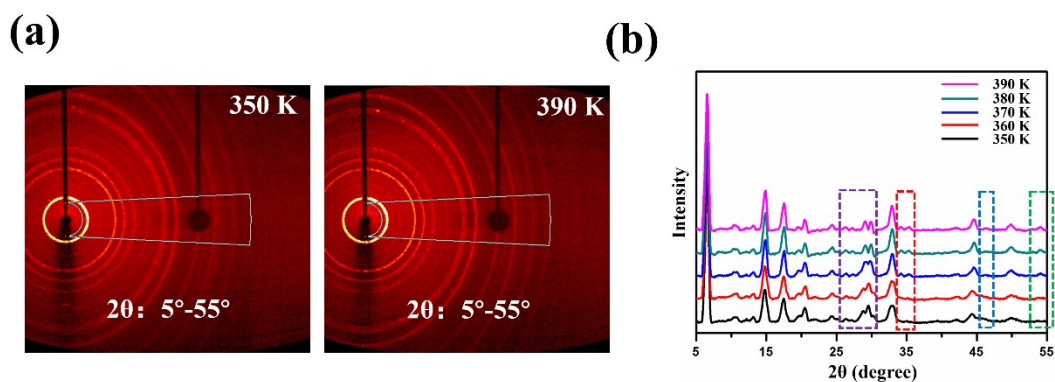

**Figure S3.** (a) Two-dimensional powder diffraction pattern of  $(\text{DPA})_4\text{AgBiBr}_8$  before (350 K) and after (390 K) phase transition temperature. (b) Variable-temperature powder X-ray diffraction patterns of  $(\text{DPA})_4\text{AgBiBr}_8$  from 350 K to 390 K.

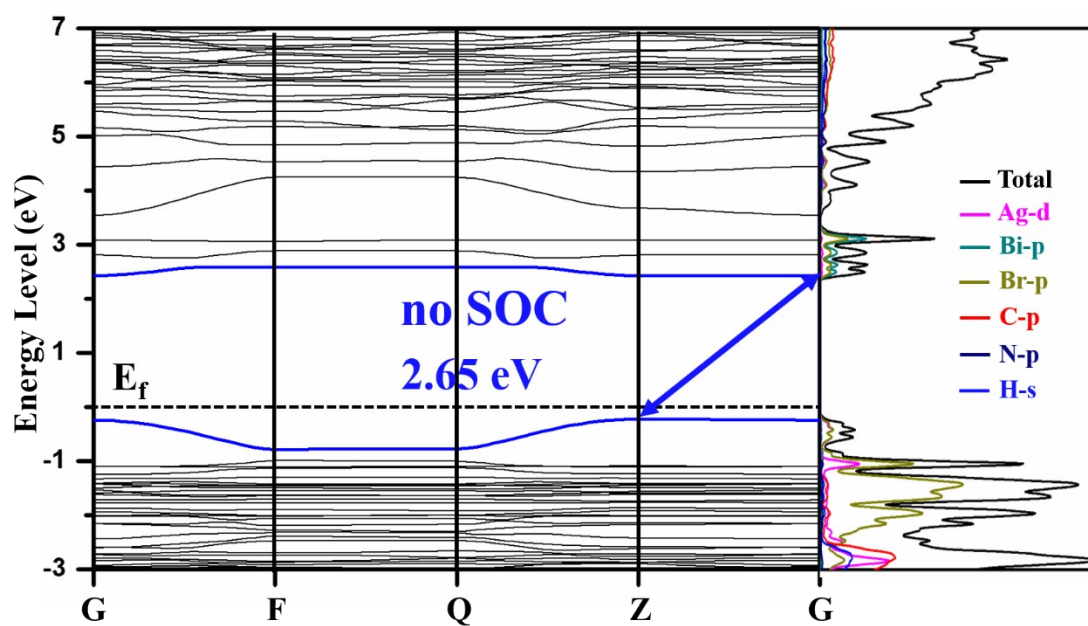

**Figure S4.** Calculated energy band structure of  $(\text{DPA})_4\text{AgBiBr}_8$  without spin-orbit coupling (SOC), and corresponding partial density of states (PDOS).

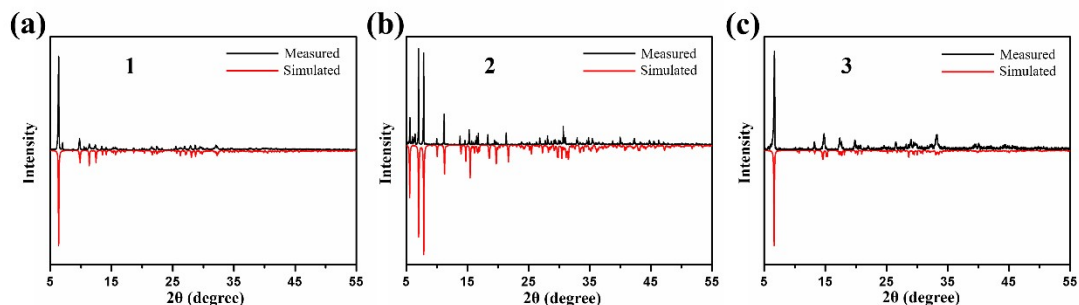

**Figure S5.** Measured and simulated powder X-ray diffraction patterns of  $(\text{DPA})_4\text{Bi}_2\text{Br}_{10}$ ,  $(\text{DPA})_5\text{Pb}_2\text{Br}_9$  and  $(\text{DPA})_4\text{AgBiBr}_8$ .

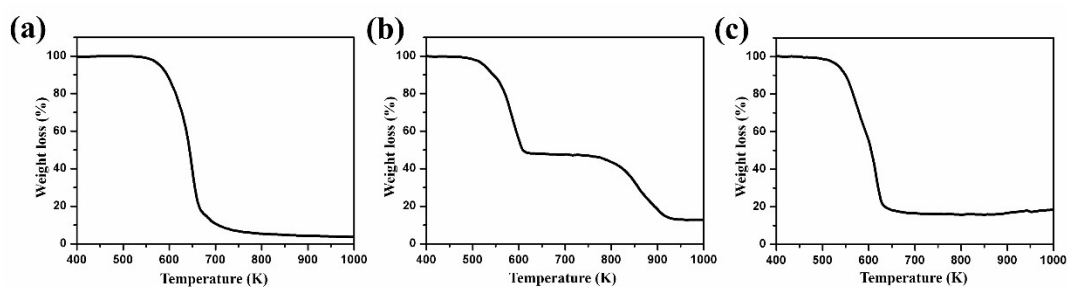

**Figure S6.** TGA curve of  $(\text{DPA})_4\text{Bi}_2\text{Br}_{10}$ ,  $(\text{DPA})_5\text{Pb}_2\text{Br}_9$  and  $(\text{DPA})_4\text{AgBiBr}_8$ .

**Table S1.** Crystal data and structure refinements for  $(\text{DPA})_4\text{Bi}_2\text{Br}_{10}$ ,  $(\text{DPA})_5\text{Pb}_2\text{Br}_9$  and  $(\text{DPA})_4\text{AgBiBr}_8$ .

|                                       | $(\text{DPA})_4\text{Bi}_2\text{Br}_{10}$ 200 K                 | $(\text{DPA})_5\text{Pb}_2\text{Br}_9$ 273 K                 | $(\text{DPA})_4\text{AgBiBr}_8$ 150 K                 |
|---------------------------------------|-----------------------------------------------------------------|--------------------------------------------------------------|-------------------------------------------------------|
| Empirical formula                     | $\text{C}_{20}\text{H}_{56}\text{Bi}_2\text{Br}_{10}\text{N}_4$ | $\text{C}_{25}\text{H}_{70}\text{Br}_9\text{N}_5\text{Pb}_2$ | $\text{C}_{20}\text{H}_{56}\text{AgBiBr}_8\text{N}_4$ |
| Formula weight                        | 1569.74                                                         | 1574.43                                                      | 1308.74                                               |
| Crystal system                        | Triclinic                                                       | Triclinic                                                    | Triclinic                                             |
| Space group                           | $P\bar{1}$                                                      | $P\bar{1}$                                                   | $P\bar{1}$                                            |
| $a$ (Å)                               | 12.4378(19)                                                     | 11.975 (2)                                                   | 8.4797(6)                                             |
| $b$ (Å)                               | 13.2166(19)                                                     | 13.366 (2)                                                   | 8.7683(6)                                             |
| $c$ (Å)                               | 14.021(3)                                                       | 17.472 (3)                                                   | 13.9411(9)                                            |
| $\alpha$ (°)                          | 97.835(4)                                                       | 72.618 (5)                                                   | 73.253(3)                                             |
| $\beta$ (°)                           | 93.139(5)                                                       | 70.213 (4)                                                   | 88.908(3)                                             |
| $\gamma$ (°)                          | 90.289(4)                                                       | 77.258 (4)                                                   | 87.415(3)                                             |
| Volume(Å <sup>3</sup> )               | 2279.7(6)                                                       | 2488.9 (8)                                                   | 991.56(12)                                            |
| Z                                     | 2                                                               | 2                                                            | 1                                                     |
| Radiation type                        | MoK $\alpha$                                                    | MoK $\alpha$                                                 | MoK $\alpha$                                          |
| Absorption correction                 | Multi-scan                                                      | Multi-scan                                                   | Multi-scan                                            |
| $D_{\text{calc}}$ /g cm <sup>-3</sup> | 2.287                                                           | 2.101                                                        | 2.192                                                 |

|                       |        |        |        |
|-----------------------|--------|--------|--------|
| $F(000)$              | 1440   | 1468   | 614    |
| GOF                   | 1.022  | 1.052  | 1.095  |
| $R_1[I > 2\sigma(I)]$ | 0.0492 | 0.0658 | 0.1097 |
| $wR2[I > 2\sigma(I)]$ | 0.1202 | 0.2002 | 0.3188 |

**Table S2.** Selected bond lengths [ $\text{\AA}$ ] and bond angles [ $^\circ$ ] for  $(\text{DPA})_4\text{Bi}_2\text{Br}_{10}$  at 200 K.

| Temperature | bond lengths [ $\text{\AA}$ ] |                              | bond angles [ $^\circ$ ]     |            |
|-------------|-------------------------------|------------------------------|------------------------------|------------|
| 200 K       | Bi01—Br0B                     | 2.7076 (12)                  | Br0B—Bi01—Br0A               | 93.49 (4)  |
|             | Bi01—Br0A                     | 2.7782 (10)                  | Br0B—Bi01—Br06               | 92.43 (3)  |
|             | Bi01—Br06                     | 2.7841 (9)                   | Br0A—Bi01—Br06               | 88.32 (3)  |
|             | Bi01—Br05                     | 2.9184 (10)                  | Br0B—Bi01—Br05               | 92.84 (3)  |
|             | Bi01—Br07                     | 3.0015 (10)                  | Br0A—Bi01—Br05               | 92.31 (3)  |
|             | Bi01—Br07 <sup>i</sup>        | 3.0754 (12)                  | Br06—Bi01—Br05               | 174.64 (3) |
|             | Bi02—Br0C                     | 2.6995 (13)                  | Br0B—Bi01—Br07               | 88.79 (3)  |
|             | Bi02—Br04                     | 2.7749 (10)                  | Br0A—Bi01—Br07               | 177.32 (3) |
|             | Bi02—Br09                     | 2.7862 (10)                  | Br06—Bi01—Br07               | 90.17 (3)  |
|             | Bi02—Br03                     | 2.9298 (10)                  | Br05—Bi01—Br07               | 88.99 (3)  |
|             | Bi02—Br08                     | 3.0014 (10)                  | Br0B—Bi01—Br07 <sup>i</sup>  | 175.47 (3) |
|             | Bi02—Br08 <sup>ii</sup>       | 3.0951 (12)                  | Br0A—Bi01—Br07 <sup>i</sup>  | 90.91 (3)  |
|             |                               |                              | Br06—Bi01—Br07 <sup>i</sup>  | 88.78 (3)  |
|             |                               |                              | Br05—Bi01—Br07 <sup>i</sup>  | 85.88 (3)  |
|             |                               |                              | Br07—Bi01—Br07 <sup>i</sup>  | 86.84 (3)  |
|             |                               |                              | Br0C—Bi02—Br04               | 92.77 (3)  |
|             |                               |                              | Br0C—Bi02—Br09               | 94.29 (4)  |
|             |                               |                              | Br04—Bi02—Br09               | 87.72 (3)  |
|             |                               |                              | Br0C—Bi02—Br03               | 91.93 (3)  |
|             |                               |                              | Br04—Bi02—Br03               | 175.27 (3) |
|             |                               |                              | Br09—Bi02—Br03               | 92.48 (3)  |
|             |                               |                              | Br0C—Bi02—Br08               | 89.79 (3)  |
|             |                               |                              | Br04—Bi02—Br08               | 88.60 (3)  |
|             |                               |                              | Br09—Bi02—Br08               | 174.64 (3) |
|             |                               |                              | Br03—Bi02—Br08               | 90.87 (3)  |
|             |                               |                              | Br0C—Bi02—Br08 <sup>ii</sup> | 174.98 (3) |
|             |                               |                              | Br04—Bi02—Br08 <sup>ii</sup> | 88.21 (3)  |
|             |                               | Br09—Bi02—Br08 <sup>ii</sup> | 90.67 (3)                    |            |
|             |                               | Br03—Bi02—Br08 <sup>ii</sup> | 87.06 (3)                    |            |
|             |                               | Br08—Bi02—Br08 <sup>ii</sup> | 85.31 (3)                    |            |
|             |                               | Bi01—Br07—Bi01 <sup>i</sup>  | 93.16 (3)                    |            |
|             |                               | Bi02—Br08—Bi02 <sup>ii</sup> | 94.69 (3)                    |            |

Symmetry codes: (i)  $-x, -y+1, -z+1$ ; (ii)  $-x+1, -y+2, -z+1$ . (200 K)

**Table S3.** Selected bond lengths [ $\text{\AA}$ ] and bond angles [ $^\circ$ ] for  $(\text{DPA})_5\text{Pb}_2\text{Br}_9$  at 273 and 310 K.

| Temperature | bond lengths [ $\text{\AA}$ ] |                          | bond angles [ $^\circ$ ]    |            |
|-------------|-------------------------------|--------------------------|-----------------------------|------------|
| 273 K       | Br1—Pb1                       | 3.1158 (13)              | Pb1—Br1—Pb2 <sup>i</sup>    | 162.60 (6) |
|             | Br1—Pb2 <sup>i</sup>          | 3.1851 (14)              | Pb1—Br5—Pb2                 | 168.15 (5) |
|             | Br2—Pb1                       | 3.0801 (15)              | Pb2—Br8—Pb1 <sup>ii</sup>   | 151.29 (4) |
|             | Br3—Pb1                       | 2.9570 (13)              | Br4—Pb1—Br3                 | 89.97 (4)  |
|             | Br4—Pb1                       | 2.9458 (13)              | Br4—Pb1—Br5                 | 95.53 (4)  |
|             | Br5—Pb1                       | 3.0082 (12)              | Br3—Pb1—Br5                 | 98.38 (4)  |
|             | Br5—Pb2                       | 3.0278 (12)              | Br4—Pb1—Br2                 | 174.73 (4) |
|             | Br6—Pb2                       | 2.9032 (13)              | Br3—Pb1—Br2                 | 85.87 (4)  |
|             | Br7—Pb2                       | 3.1475 (15)              | Br5—Pb1—Br2                 | 88.27 (4)  |
|             | Br8—Pb2                       | 3.0773 (12)              | Br4—Pb1—Br8 <sup>iii</sup>  | 85.37 (4)  |
|             | Br8—Pb1 <sup>ii</sup>         | 3.0918 (12)              | Br3—Pb1—Br8 <sup>iii</sup>  | 90.98 (4)  |
|             | Br9—Pb2                       | 2.8852 (15)              | Br5—Pb1—Br8 <sup>iii</sup>  | 170.59 (3) |
|             |                               |                          | Br2—Pb1—Br8 <sup>iii</sup>  | 91.47 (4)  |
|             |                               |                          | Br4—Pb1—Br1                 | 92.79 (4)  |
|             |                               |                          | Br3—Pb1—Br1                 | 175.45 (4) |
|             |                               |                          | Br5—Pb1—Br1                 | 84.96 (4)  |
|             |                               |                          | Br2—Pb1—Br1                 | 91.18 (4)  |
|             |                               |                          | Br8 <sup>iii</sup> —Pb1—Br1 | 85.64 (4)  |
|             |                               |                          | Br9—Pb2—Br6                 | 90.43 (4)  |
|             |                               |                          | Br9—Pb2—Br5                 | 95.91 (4)  |
|             |                               |                          | Br6—Pb2—Br5                 | 95.66 (4)  |
|             |                               |                          | Br9—Pb2—Br8                 | 91.03 (4)  |
|             |                               |                          | Br6—Pb2—Br8                 | 89.88 (4)  |
|             |                               |                          | Br5—Pb2—Br8                 | 171.07 (3) |
|             |                               |                          | Br9—Pb2—Br7                 | 173.83 (4) |
|             |                               |                          | Br6—Pb2—Br7                 | 84.29 (4)  |
|             |                               |                          | Br5—Pb2—Br7                 | 87.81 (4)  |
|             |                               |                          | Br8—Pb2—Br7                 | 85.78 (4)  |
|             |                               |                          | Br9—Pb2—Br1 <sup>i</sup>    | 99.62 (4)  |
|             |                               |                          | Br6—Pb2—Br1 <sup>i</sup>    | 169.26 (4) |
|             |                               | Br5—Pb2—Br1 <sup>i</sup> | 87.13 (4)                   |            |
|             |                               | Br8—Pb2—Br1 <sup>i</sup> | 86.17 (4)                   |            |
|             |                               | Br7—Pb2—Br1 <sup>i</sup> | 85.46 (4)                   |            |
| 310 K       | Br1—Pb2                       | 3.0715 (12)              | Pb2—Br1—Pb1 <sup>i</sup>    | 152.03 (5) |
|             | Br1—Pb1 <sup>i</sup>          | 3.0862 (12)              | Pb1—Br2—Pb2                 | 168.88 (6) |
|             | Br2—Pb1                       | 3.0189 (12)              | Pb1—Br6—Pb2 <sup>ii</sup>   | 164.86 (6) |
|             | Br2—Pb2                       | 3.0338 (12)              | Br3—Pb1—Br4                 | 90.34 (4)  |
|             | Br3—Pb1                       | 2.9389 (13)              | Br3—Pb1—Br2                 | 98.68 (4)  |
|             | Br4—Pb1                       | 2.9554 (14)              | Br4—Pb1—Br2                 | 95.44 (4)  |
|             | Br5—Pb2                       | 2.8957 (13)              | Br3—Pb1—Br8                 | 85.54 (4)  |

|                       |             |                             |            |
|-----------------------|-------------|-----------------------------|------------|
| Br6—Pb1               | 3.1315 (13) | Br4—Pb1—Br8                 | 174.65 (4) |
| Br6—Pb2 <sup>ii</sup> | 3.1833 (14) | Br2—Pb1—Br8                 | 88.57 (4)  |
| Br7—Pb2               | 2.9059 (15) | Br3—Pb1—Br1 <sup>iii</sup>  | 90.72 (4)  |
| Br8—Pb1               | 3.0852 (15) | Br4—Pb1—Br1 <sup>iii</sup>  | 85.72 (4)  |
| Br9—Pb2               | 3.1416 (16) | Br2—Pb1—Br1 <sup>iii</sup>  | 170.51 (4) |
|                       |             | Br8—Pb1—Br1 <sup>iii</sup>  | 90.91 (4)  |
|                       |             | Br3—Pb1—Br6                 | 174.77 (4) |
|                       |             | Br4—Pb1—Br6                 | 92.63 (4)  |
|                       |             | Br2—Pb1—Br6                 | 85.33 (4)  |
|                       |             | Br8—Pb1—Br6                 | 91.22 (4)  |
|                       |             | Br1 <sup>iii</sup> —Pb1—Br6 | 85.21 (4)  |
|                       |             | Br5—Pb2—Br7                 | 90.45 (4)  |
|                       |             | Br5—Pb2—Br2                 | 96.40 (4)  |
|                       |             | Br7—Pb2—Br2                 | 95.90 (4)  |
|                       |             | Br5—Pb2—Br1                 | 89.68 (4)  |
|                       |             | Br7—Pb2—Br1                 | 90.49 (4)  |
|                       |             | Br2—Pb2—Br1                 | 171.13 (4) |
|                       |             | Br5—Pb2—Br9                 | 84.45 (5)  |
|                       |             | Br7—Pb2—Br9                 | 173.93 (4) |
|                       |             | Br2—Pb2—Br9                 | 87.96 (4)  |
|                       |             | Br1—Pb2—Br9                 | 86.20 (4)  |
|                       |             | Br5—Pb2—Br6 <sup>ii</sup>   | 170.20 (4) |
|                       |             | Br7—Pb2—Br6 <sup>ii</sup>   | 98.19 (4)  |
|                       |             | Br2—Pb2—Br6 <sup>ii</sup>   | 87.35 (4)  |
|                       |             | Br1—Pb2—Br6 <sup>ii</sup>   | 85.65 (4)  |
|                       |             | Br9—Pb2—Br6 <sup>ii</sup>   | 86.64 (4)  |

Symmetry codes: (i)  $-x+1, -y+1, -z+1$ ; (ii)  $x-1, y, z$ ; (iii)  $x+1, y, z$ . (273 K)

Symmetry codes: (i)  $x-1, y, z$ ; (ii)  $-x+1, -y+1, -z+1$ ; (iii)  $x+1, y, z$ . (310 K)

**Table S4.** Selected bond lengths [Å] and bond angles [°] for **(DPA)<sub>4</sub>AgBiBr<sub>8</sub>** at 150 and 375 K.

| Temperatur<br>e | bond lengths [Å]      |                | bond angles [°]                        |            |
|-----------------|-----------------------|----------------|----------------------------------------|------------|
| 150 K           | Bi1—Br1 <sup>i</sup>  | 2.827 (2)      | Br1 <sup>i</sup> —Bi1—Br1              | 180.0      |
|                 | Bi1—Br1               | 2.827 (2)      | Br1 <sup>i</sup> —Bi1—Br3              | 92.26 (7)  |
|                 | Bi1—Br3               | 2.8347<br>(19) | Br1—Bi1—Br3                            | 87.74 (7)  |
|                 | Bi1—Br3 <sup>i</sup>  | 2.8348<br>(19) | Br1 <sup>i</sup> —Bi1—Br3 <sup>i</sup> | 87.74 (7)  |
|                 | Bi1—Br2 <sup>i</sup>  | 2.873 (2)      | Br1—Bi1—Br3 <sup>i</sup>               | 92.26 (7)  |
|                 | Bi1—Br2               | 2.873 (2)      | Br3—Bi1—Br3 <sup>i</sup>               | 180.00 (8) |
|                 | Ag1—Br4 <sup>ii</sup> | 2.547 (3)      | Br1 <sup>i</sup> —Bi1—Br2 <sup>i</sup> | 88.43 (11) |



|       |                        |            |                                           |            |
|-------|------------------------|------------|-------------------------------------------|------------|
|       | Ag1—Br4                | 2.547 (3)  | Br1—Bi1—Br2 <sup>i</sup>                  | 91.57 (11) |
|       |                        |            | Br3—Bi1—Br2 <sup>i</sup>                  | 91.07 (7)  |
|       |                        |            | Br3 <sup>i</sup> —Bi1—Br2 <sup>i</sup>    | 88.93 (7)  |
|       |                        |            | Br1 <sup>i</sup> —Bi1—Br2                 | 91.57 (11) |
|       |                        |            | Br1—Bi1—Br2                               | 88.43 (11) |
|       |                        |            | Br3—Bi1—Br2                               | 88.93 (7)  |
|       |                        |            | Br3 <sup>i</sup> —Bi1—Br2                 | 91.07 (7)  |
|       |                        |            | Br2 <sup>i</sup> —Bi1—Br2                 | 180.0      |
|       |                        |            | Br4 <sup>ii</sup> —Ag1—Br4                | 180.0      |
| 375 K | Ag1—Br1 <sup>i</sup>   | 2.538 (13) | Br1 <sup>i</sup> —Ag1—Br1                 | 180.0      |
|       | Ag1—Br1                | 2.538 (13) | Br1 <sup>i</sup> —Ag1—Br3                 | 90.000 (1) |
|       | Ag1—Br3                | 3.335 (9)  | Br1—Ag1—Br3                               | 90.000 (1) |
|       | Bi1—Br2 <sup>ii</sup>  | 2.816 (13) | Br2 <sup>ii</sup> —Bi1—Br2                | 180.0      |
|       | Bi1—Br2                | 2.816 (13) | Br2 <sup>ii</sup> —Bi1—Br3                | 90.000 (1) |
|       | Bi1—Br3                | 2.868 (9)  | Br2—Bi1—Br3                               | 90.000 (1) |
|       | Bi1—Br3 <sup>iii</sup> | 2.868 (9)  | Br2 <sup>ii</sup> —Bi1—Br3 <sup>iii</sup> | 90.000 (1) |
|       | Bi1—Br3 <sup>iii</sup> | 2.868 (9)  | Br2—Bi1—Br3 <sup>iii</sup>                | 90.000 (2) |
|       | Bi1—Br3 <sup>iv</sup>  | 2.868 (9)  | Br3—Bi1—Br3 <sup>iii</sup>                | 180.0      |
|       |                        |            | Br2 <sup>ii</sup> —Bi1—Br3 <sup>iii</sup> | 90.000 (3) |
|       |                        |            | Br2—Bi1—Br3 <sup>iii</sup>                | 90.000 (1) |
|       |                        |            | Br3—Bi1—Br3 <sup>iii</sup>                | 90.5 (6)   |
|       |                        |            | Br3 <sup>ii</sup> —Bi1—Br3 <sup>iii</sup> | 89.5 (5)   |
|       |                        |            | Br2 <sup>ii</sup> —Bi1—Br3 <sup>iv</sup>  | 90.000 (1) |
|       |                        |            | Br2—Bi1—Br3 <sup>iv</sup>                 | 90.000 (3) |
|       |                        |            | Br3—Bi1—Br3 <sup>iv</sup>                 | 89.5 (5)   |
|       |                        |            | Br3 <sup>ii</sup> —Bi1—Br3 <sup>iv</sup>  | 90.5 (6)   |
|       |                        |            | Br3 <sup>iii</sup> —Bi1—Br3 <sup>iv</sup> | 180.0      |
|       |                        |            | Bi1—Br3—Ag1                               | 179.5 (5)  |

Symmetry codes: (i)  $-x+1, -y+1, -z+1$ ; (ii)  $-x+2, -y+2, -z+1$ ; (iii)  $-x+1, -y+2, -z+1$ ; (iv)  $x+1, y, z$ . (150 K)

Symmetry codes: (i)  $-x, -y+1, -z$ ; (ii)  $-x+1, -y+1, -z+1$ ; (iii)  $x, y, -z+1$ ; (iv)  $-x+1, -y+1, z$ ; (v)  $-x+1, y, -z+2$ ; (vi)  $-x+1, y, z$ ; (vii)  $x, y, -z+2$ ; (viii)  $-x, y, z$ ; (ix)  $-x, y, -z+1$ . (375 K)

**Table S5.** Hydrogen-bond geometry (Å, °) for **(DPA)<sub>4</sub>Bi<sub>2</sub>Br<sub>10</sub>** at 200 K.

| <i>D</i> —H··· <i>A</i>        | <i>D</i> —H | H··· <i>A</i> | <i>D</i> ··· <i>A</i> | <i>D</i> —H··· <i>A</i> |
|--------------------------------|-------------|---------------|-----------------------|-------------------------|
| C9—H9B···Br08 <sup>iii</sup>   | 0.99        | 3.03          | 3.835 (14)            | 139                     |
| C00N—H00P···Br03               | 0.99        | 2.99          | 3.635 (15)            | 124                     |
| C00N—H00O···Br0B               | 0.99        | 3.01          | 3.982 (15)            | 167                     |
| C00M—H00M···Br07 <sup>iv</sup> | 0.99        | 2.97          | 3.787 (14)            | 141                     |
| C3H—H3H2···Br0C                | 0.99        | 3.04          | 4.009 (14)            | 166                     |
| C3H—H3H1···Br05 <sup>iv</sup>  | 0.99        | 3.02          | 3.659 (14)            | 123                     |

|                                 |      |      |           |     |
|---------------------------------|------|------|-----------|-----|
| N00G—H00L···Br06 <sup>iv</sup>  | 0.91 | 2.60 | 3.423 (8) | 150 |
| N00G—H00K···Br05 <sup>v</sup>   | 0.91 | 2.74 | 3.488 (8) | 140 |
| N00G—H00K···Br04 <sup>iii</sup> | 0.91 | 2.97 | 3.534 (8) | 122 |
| N00G—H00J···Br09 <sup>iii</sup> | 0.91 | 2.61 | 3.485 (8) | 163 |
| N00F—H00I···Br0A                | 0.91 | 2.71 | 3.514 (8) | 148 |
| N00F—H00H···Br06                | 0.91 | 2.83 | 3.503 (8) | 132 |
| N00F—H00H···Br03 <sup>v</sup>   | 0.91 | 2.81 | 3.496 (9) | 133 |
| N00F—H00G···Br04 <sup>iii</sup> | 0.91 | 2.55 | 3.438 (8) | 166 |
| N00E—H00F···Br05                | 0.91 | 2.44 | 3.340 (8) | 168 |
| N00E—H00E···Br0A                | 0.91 | 2.99 | 3.585 (8) | 125 |
| N00E—H00E···Br04 <sup>ii</sup>  | 0.91 | 2.93 | 3.438 (9) | 117 |
| N00E—H00E···Br03                | 0.91 | 2.66 | 3.333 (8) | 131 |
| N00E—H00D···Br08                | 0.91 | 2.64 | 3.463 (8) | 151 |
| N00D—H00C···Br07 <sup>iv</sup>  | 0.91 | 2.66 | 3.477 (7) | 150 |
| N00D—H00B···Br09                | 0.91 | 2.96 | 3.555 (8) | 125 |
| N00D—H00B···Br06 <sup>v</sup>   | 0.91 | 2.93 | 3.478 (8) | 120 |
| N00D—H00B···Br05 <sup>iv</sup>  | 0.91 | 2.67 | 3.326 (7) | 130 |
| N00D—H00A···Br03                | 0.91 | 2.45 | 3.344 (7) | 166 |

Symmetry codes: (ii)  $-x+1, -y+2, -z+1$ ; (iii)  $x, y-1, z$ ; (iv)  $x+1, y, z$ ; (v)  $-x+1, -y+1, -z+1$ .

**Table S6.** Hydrogen-bond geometry (Å, °) for (DPA)<sub>5</sub>Pb<sub>2</sub>Br<sub>9</sub> at 273 K.

| <i>D—H···A</i>                   | <i>D—H</i> | <i>H···A</i> | <i>D···A</i> | <i>D—H···A</i> |
|----------------------------------|------------|--------------|--------------|----------------|
| N5—H5E···Br9                     | 0.89       | 2.63         | 3.349 (19)   | 139            |
| N5—H5D···Br6                     | 0.89       | 2.81         | 3.519 (18)   | 137            |
| N5—H5D···Br3 <sup>ii</sup>       | 0.89       | 3.07         | 3.510 (17)   | 113            |
| N5—H5C···Br4 <sup>ii</sup>       | 0.89       | 2.87         | 3.396 (15)   | 120            |
| N5—H5D···Br3 <sup>ii</sup>       | 0.89       | 3.07         | 3.510 (17)   | 113            |
| C25—H25A···Br9                   | 0.97       | 2.99         | 3.570 (12)   | 120            |
| N4—H4F···Br3 <sup>iv</sup>       | 0.89       | 2.79         | 3.495 (14)   | 137            |
| N4—H4E···Br7 <sup>v</sup>        | 0.89       | 3.13         | 3.852 (13)   | 139            |
| N4—H4E···Br6 <sup>v</sup>        | 0.89       | 2.81         | 3.469 (13)   | 132            |
| N4—H4D···Br8 <sup>v</sup>        | 0.89       | 3.00         | 3.423 (12)   | 111            |
| N4—H4D···Br2 <sup>iv</sup>       | 0.89       | 3.03         | 3.832 (14)   | 151            |
| N3—H3F···Br7 <sup>vi</sup>       | 0.89       | 3.02         | 3.893 (15)   | 167            |
| N3—H3E···Br8                     | 0.89       | 2.99         | 3.737 (14)   | 143            |
| N3—H3E···Br1 <sup>ii</sup>       | 0.89       | 2.99         | 3.441 (12)   | 114            |
| N3—H3D···Br4 <sup>ii</sup>       | 0.89       | 2.64         | 3.430 (14)   | 149            |
| C12—H12B···Br9                   | 0.97       | 3.01         | 3.951 (17)   | 164            |
| C12—<br>H12A···Br8 <sup>vi</sup> | 0.97       | 3.12         | 3.782 (15)   | 127            |
| N2—H2F···Br2                     | 0.89       | 2.81         | 3.605 (14)   | 150            |

|                             |          |          |            |         |
|-----------------------------|----------|----------|------------|---------|
| N2—H2E···Br1                | 0.89     | 2.71     | 3.488 (13) | 147     |
| N2—H2D···Br7                | 0.89     | 2.85     | 3.607 (13) | 144     |
| N2—H2D···Br1 <sup>i</sup>   | 0.89     | 3.09     | 3.620 (14) | 120     |
| N1—H1C···Br7 <sup>vii</sup> | 0.89 (1) | 2.73 (2) | 3.495 (12) | 144 (2) |
| N1—H1B···Br2 <sup>vii</sup> | 0.89 (1) | 2.90 (2) | 3.430 (15) | 120 (2) |
| C5—H5B···Br2 <sup>vii</sup> | 0.97     | 3.12     | 3.715 (14) | 121     |

Symmetry codes: (i)  $-x+1, -y+1, -z+1$ ; (ii)  $x-1, y, z$ ; (iv)  $x-1, y-1, z$ ; (v)  $x, y-1, z$ ; (vi)  $-x, -y+1, -z+1$ ; (vii)  $-x+1, -y+2, -z+1$ .

**Table S7.** Hydrogen-bond geometry (Å, °) for **(DPA)<sub>4</sub>AgBiBr<sub>8</sub>** at 150 K.

| <i>D—H···A</i>              | <i>D—H</i> | <i>H···A</i> | <i>D···A</i> | <i>D—H···A</i> |
|-----------------------------|------------|--------------|--------------|----------------|
| C7—H7A···Br1                | 0.99       | 2.87         | 3.77 (4)     | 151            |
| N2—H2C···Br2 <sup>i</sup>   | 0.91       | 2.86         | 3.70 (2)     | 154            |
| N2—H2B···Br3 <sup>iii</sup> | 0.91       | 2.84         | 3.45 (2)     | 126            |
| N2—H2B···Br1 <sup>iii</sup> | 0.91       | 3.05         | 3.71 (2)     | 131            |
| N2—H2A···Br4                | 0.91       | 2.66         | 3.43 (2)     | 144            |
| N1—H1E···Br3 <sup>iv</sup>  | 0.91       | 2.72         | 3.56 (3)     | 154            |
| N1—H1D···Br4 <sup>ii</sup>  | 0.91       | 2.52         | 3.34 (3)     | 150            |
| N1—H1D···Br2 <sup>i</sup>   | 0.91       | 3.25         | 3.58 (3)     | 104            |
| N1—H1D···Br1 <sup>iv</sup>  | 0.91       | 3.14         | 3.55 (3)     | 109            |
| N1—H1C···Br2 <sup>iv</sup>  | 0.91       | 3.01         | 3.65 (3)     | 129            |
| C1—H1B···Br1 <sup>i</sup>   | 0.99       | 2.97         | 3.88 (4)     | 154            |

Symmetry codes: (i)  $-x+1, -y+1, -z+1$ ; (ii)  $-x+2, -y+2, -z+1$ ; (iii)  $-x+1, -y+2, -z+1$ ; (iv)  $x+1, y, z$ .

**Table S8.** Crystal data and structure refinements for **(DPA)<sub>5</sub>Pb<sub>2</sub>Br<sub>9</sub>** and **(DPA)<sub>4</sub>AgBiBr<sub>8</sub>** at high temperature phase.

|                         | <b>(DPA)<sub>5</sub>Pb<sub>2</sub>Br<sub>9</sub></b> (310 K)                   | <b>(DPA)<sub>4</sub>AgBiBr<sub>8</sub></b> (375 K) |
|-------------------------|--------------------------------------------------------------------------------|----------------------------------------------------|
| Empirical formula       | C <sub>25</sub> H <sub>69</sub> Br <sub>9</sub> N <sub>5</sub> Pb <sub>2</sub> | C <sub>20</sub> AgBiBr <sub>8</sub> N <sub>8</sub> |
| Formula weight          | 1573.42                                                                        | 1308.41                                            |
| Crystal system          | Triclinic                                                                      | Orthorhombic                                       |
| Space group             | <i>P</i> $\bar{1}$                                                             | <i>Cmmm</i>                                        |
| <i>a</i> (Å)            | 11.996(2)                                                                      | 8.774(10)                                          |
| <i>b</i> (Å)            | 13.422(2)                                                                      | 27.47(3)                                           |
| <i>c</i> (Å)            | 17.477(3)                                                                      | 8.771(9)                                           |
| $\alpha$ (°)            | 72.658(4)                                                                      | 90                                                 |
| $\beta$ (°)             | 70.158(4)                                                                      | 90                                                 |
| $\gamma$ (°)            | 77.179(4)                                                                      | 90                                                 |
| Volume(Å <sup>3</sup> ) | 2503.6(8)                                                                      | 2114(4)                                            |
| <i>Z</i>                | 2                                                                              | 2                                                  |

|                                      |              |              |
|--------------------------------------|--------------|--------------|
| Radiation type                       | MoK $\alpha$ | MoK $\alpha$ |
| Absorption correction                | Multi-scan   | Multi-scan   |
| $D_{\text{calc}} / \text{g cm}^{-3}$ | 2.087        | 2.056        |
| $F(000)$                             | 1466         | 1172         |
| GOF                                  | 1.054        | 1.244        |
| $R_1[I > 2\sigma(I)]$                | 0.0605       | 0.1110       |
| $wR2[I > 2\sigma(I)]$                | 0.1824       | 0.3235       |

**Table S9.** The reported space group and band gap of Ruddlesden–Popper AgBiBr- and AgBiI-based materials (n=1).

| Formula                                                   | Space group                                            | Band gap (eV) | Ref       |
|-----------------------------------------------------------|--------------------------------------------------------|---------------|-----------|
| (BA) <sub>4</sub> AgBiBr <sub>8</sub>                     | <i>C2/m</i> (278 K)<br><i>P2<sub>1</sub>/c</i> (100 K) | 2.5           | 4         |
| (BA) <sub>4</sub> AgBiBr <sub>8</sub>                     | <i>Bmab</i>                                            | 2.65          | 5         |
| (PA) <sub>4</sub> AgBiBr <sub>8</sub>                     | <i>C2/m</i>                                            | 2.41          | 6         |
| (PA) <sub>2</sub> CsAgBiBr <sub>7</sub>                   | <i>P2<sub>1</sub>/m</i>                                | 2.32          | 6         |
| (BDA) <sub>4</sub> AgBiBr <sub>8</sub>                    | <i>P1</i>                                              | 2.43          | 6         |
| (OcA) <sub>4</sub> AgBiBr <sub>8</sub>                    | <i>P2/m</i>                                            | 2.45          | 6         |
| (DPA) <sub>4</sub> AgBiBr <sub>8</sub>                    | <i>P1</i> (150 K)                                      | 2.44          | this work |
|                                                           | <i>Cmmm</i> (375 K)                                    |               |           |
| (IPA) <sub>4</sub> AgBiI <sub>8</sub>                     | <i>P1</i>                                              | 1.87          | 7         |
| (3-IPA) <sub>4</sub> AgBiI <sub>8</sub>                   | <i>P1</i>                                              | 1.87          | 7         |
| (4-AMP) <sub>4</sub> AgBiI <sub>8</sub> ·H <sub>2</sub> O | <i>C2<sub>1</sub>/c</i>                                | 2.1           | 8         |
| (4-APP) <sub>4</sub> AgBiI <sub>8</sub> ·H <sub>2</sub> O | <i>C2/c</i>                                            | 2.1           | 8         |

**Appendix S1.** Acronyms arranged in top-down order in Table S9.

|                                   |                                       |
|-----------------------------------|---------------------------------------|
| BA: Butylammonium                 | PA: Propylammonium                    |
| BDA: Butane-1,4-diammonium        | OcA: Octylammonium                    |
| DPA: 2,2-dimethylpropan-1-aminium | IPA: 3-iodopropan-1-aminium           |
| 3-IPA: 3-Iodopropylammonium       | 4-AMP: 4-(Ammoniomethyl) piperidinium |
| 4-APP: 4-Ammoniumpiperidine       |                                       |

#### Reference:

- (1) Kresse, G.; Furthmüller, J. Efficiency of ab-initio total energy calculations for metals and semiconductors using a plane-wave basis set. *Comput. Mater. Sci.* **1996**, *6*, 15-50.
- (2) Perdew, J. P.; Ernzerhof, M.; Burke, K. Rationale for mixing exact exchange with density functional approximations. *J. Chem. Phys.* **1996**, *105*, 9982.
- (3) Blöchl, P. E. Projector augmented-wave method. *Phys. Rev. B* **1994**, *50*,

17953-17979.

(4) Connor, B. A.; Leppert, L.; Smith, M. D.; Neaton, J. B.; Karunadasa, H. I. Layered Halide Double Perovskites: Dimensional Reduction of Cs<sub>2</sub>AgBiBr<sub>6</sub>. *J. Am. Chem. Soc.* **2018**, *140*, 5235-5240.

(5) McClure, E. T.; McCormick, A. P.; Woodward, P. M. Four Lead-free Layered Double Perovskites with the n = 1 Ruddlesden-Popper Structure. *Inorg. Chem.* **2020**, *59*, 6010-6017.

(6) Mao, L.; Teicher, S. M. L.; Stoumpos, C. C.; Kennard, R. M.; DeCrescent, R. A.; Wu, G.; Schuller, J. A.; Chabinyc, M. L.; Cheetham, A. K.; Seshadri, R. Chemical and Structural Diversity of Hybrid Layered Double Perovskite Halides. *J. Am. Chem. Soc.* **2019**, *141*, 19099-19109.

(7) Yao, Y.; Kou, B.; Peng, Y.; Wu, Z.; Li, L.; Wang, S.; Zhang, X.; Liu, X.; Luo, J. (C<sub>3</sub>H<sub>9</sub>Ni)<sub>4</sub>AgBiI<sub>8</sub>: a direct-bandgap layered double perovskite based on a short-chain spacer cation for light absorption. *Chem. Commun. (Cambridge, U. K.)* **2020**, *56*, 3206-3209.

(8) Lassoued, M. S.; Bi, L.-Y.; Wu, Z.; Zhou, G.; Zheng, Y.-Z. Piperidine-induced Switching of the direct band gaps of Ag(i)/Bi(iii) bimetallic iodide double perovskites. *J. Mater. Chem. C* **2020**, *8*, 5349-5354.
